# Supplementary material
Source: PubMed Central journal article supplement (PMC7056554)
Supplement: NIHMS1544271-supplement-1.pdf [file NIHMS1544271-supplement-1.pdf]

**Supplementary Table 1:** Hazard ratios and 95% confidence intervals of the association between statin use and risk of prostate cancer subgroups defined by tumor characteristics in the Health Professionals Follow-up Study, 1990-2009

|                                    | Cases, n | HR <sup>a</sup> (95% CI) | HR <sup>b</sup> (95% CI) |
|------------------------------------|----------|--------------------------|--------------------------|
| <b>All cases</b>                   | 5,511    |                          |                          |
| <b>Statin use</b>                  |          |                          |                          |
| Never/past                         | 4,380    | 1.00 (ref)               | 1.00 (ref)               |
| Current                            | 1,131    | 1.07 (0.99-1.14)         | 0.99 (0.91-1.07)         |
| <b>Statin use</b>                  |          |                          |                          |
| Never                              | 4,168    | 1.00 (ref)               | 1.00 (ref)               |
| Ever                               | 1,343    | 1.05 (0.99-1.13)         | 0.98 (0.91-1.06)         |
| <b>Duration of statin use</b>      |          |                          |                          |
| Never                              | 4,168    | 1.00 (ref)               | 1.00 (ref)               |
| <5 years                           | 776      | 1.09 (1.00-1.17)         | 1.02 (0.94-1.12)         |
| ≥5 years                           | 567      | 1.01 (0.92-1.11)         | 0.91 (0.82-1.01)         |
| <b>Per year of statin use</b>      | 5,511    | 1.01 (1.00-1.02)         | 1.00 (0.98-1.01)         |
| <b>Localized cases<sup>c</sup></b> | 4,161    |                          |                          |
| <b>Statin use</b>                  |          |                          |                          |
| Never/past                         | 3,242    | 1.00 (ref)               | 1.00 (ref)               |
| Current                            | 919      | 1.11 (1.03-1.20)         | 1.00 (0.92-1.10)         |
| <b>Statin use</b>                  |          |                          |                          |
| Never                              | 3,075    | 1.00 (ref)               | 1.00 (ref)               |
| Ever                               | 1,086    | 1.10 (1.02-1.18)         | 1.00 (0.91-1.01)         |
| <b>Duration of statin use</b>      |          |                          |                          |
| Never                              | 3,075    | 1.00 (ref)               | 1.00 (ref)               |
| <5 years                           | 622      | 1.13 (1.03-1.24)         | 1.05 (0.95-1.15)         |
| ≥5 years                           | 464      | 1.05 (0.95-1.17)         | 0.92 (0.82-1.04)         |
| <b>Per year of statin use</b>      | 4,161    | 1.01 (1.00-1.02)         | 1.00 (0.99-1.01)         |
| <b>Advanced cases<sup>d</sup></b>  | 440      |                          |                          |
| <b>Statin use</b>                  |          |                          |                          |
| Never/past                         | 383      | 1.00 (ref)               | 1.00 (ref)               |
| Current                            | 57       | 0.83 (0.62-1.12)         | 0.94 (0.68-1.31)         |
| <b>Statin use</b>                  |          |                          |                          |
| Never                              | 370      | 1.00 (ref)               | 1.00 (ref)               |
| Ever                               | 70       | 0.85 (0.65-1.12)         | 0.98 (0.72-1.34)         |
| <b>Duration of statin use</b>      |          |                          |                          |
| Never                              | 370      | 1.00 (ref)               | 1.00 (ref)               |
| <5 years                           | 50       | 1.01 (0.74-1.37)         | 1.15 (0.82-1.61)         |
| ≥5 years                           | 20       | 0.59 (0.37-0.95)         | 0.68 (0.41-1.13)         |
| <b>Per year of statin use</b>      | 440      | 0.95 (0.91-1.00)         | 0.97 (0.92-1.02)         |
| <b>Low grade cases<sup>e</sup></b> | 3,434    |                          |                          |
| <b>Statin use</b>                  |          |                          |                          |
| Never/past                         | 2,691    | 1.00 (ref)               | 1.00 (ref)               |
| Current                            | 743      | 1.11 (1.01-1.20)         | 0.99 (0.89-1.09)         |
| <b>Statin use</b>                  |          |                          |                          |
| Never                              | 2,562    | 1.00 (ref)               | 1.00 (ref)               |

|                                     |       |                  |                  |
|-------------------------------------|-------|------------------|------------------|
| Ever                                | 743   | 1.08 (0.99-1.17) | 0.97 (0.88-1.07) |
| <b>Duration of statin use</b>       |       |                  |                  |
| Never                               | 2,562 | 1.00 (ref)       | 1.00 (ref)       |
| <5 years                            | 493   | 1.08 (0.98-1.20) | 1.00 (0.89-1.11) |
| ≥5 years                            | 379   | 1.08 (0.96-1.21) | 0.93 (0.82-1.05) |
| <b>Per year of statin use</b>       | 3,434 | 1.01 (1.00-1.03) | 1.00 (0.99-1.01) |
| <b>High grade cases<sup>f</sup></b> | 1,207 |                  |                  |
| <b>Statin use</b>                   |       |                  |                  |
| Never/past                          | 950   | 1.00 (ref)       | 1.00 (ref)       |
| Current                             | 257   | 1.02 (0.88-1.18) | 0.98 (0.83-1.16) |
| <b>Statin use</b>                   |       |                  |                  |
| Never                               | 897   | 1.00 (ref)       | 1.00 (ref)       |
| Ever                                | 310   | 1.03 (0.90-1.19) | 1.01 (0.86-1.18) |
| <b>Duration of statin use</b>       |       |                  |                  |
| Never                               | 897   | 1.00 (ref)       | 1.00 (ref)       |
| <5 years                            | 184   | 1.14 (0.96-1.34) | 1.11 (0.92-1.33) |
| ≥5 years                            | 126   | 0.90 (0.74-1.10) | 0.87 (0.70-1.08) |
| <b>Per year of statin use</b>       | 1,207 | 0.99 (0.97-1.01) | 0.99 (0.97-1.01) |
| <b>Lethal cases<sup>g</sup></b>     | 745   |                  |                  |
| <b>Statin use</b>                   |       |                  |                  |
| Never/past                          | 657   | 1.00 (ref)       | 1.00 (ref)       |
| Current                             | 88    | 0.72 (0.57-0.91) | 0.77 (0.59-0.99) |
| <b>Statin use</b>                   |       |                  |                  |
| Never                               | 632   | 1.00 (ref)       | 1.00 (ref)       |
| Ever                                | 113   | 0.77 (0.62-0.96) | 0.84 (0.66-1.06) |
| <b>Duration of statin use</b>       |       |                  |                  |
| Never                               | 632   | 1.00 (ref)       | 1.00 (ref)       |
| <5 years                            | 79    | 0.91 (0.72-1.16) | 0.97 (0.75-1.27) |
| ≥5 years                            | 34    | 0.55 (0.38-0.79) | 0.60 (0.41-0.88) |
| <b>Per year of statin use</b>       | 745   | 0.95 (0.92-0.99) | 0.96 (0.93-1.00) |

<sup>a</sup>adjusted for age and calendar time

<sup>b</sup>adjusted for age, calendar time, race, family history of prostate cancer in father or brother, height, body mass index at age 21 years, body mass index, smoking, history of high cholesterol, history of hypertension, history of diabetes, PSA testing in the two years prior to the questionnaire date, PSA testing in >50% of possible time periods, aspirin use, physical activity, total calories.

<sup>c</sup>Localized cases defined as stage T1a - T2b and N0, M0 at diagnosis

<sup>d</sup>Advanced cases defined as stage T3b - T4, N1, or M1 at diagnosis

<sup>e</sup>Low grade cases defined as ≤Gleason 3+4 at diagnosis

<sup>f</sup>High grade defined as ≥Gleason 4+3 at diagnosis

<sup>g</sup>Lethal cases defined as M1 at diagnosis or distant metastasis / fatal during follow up
