# Supplementary material
Source: PubMed Central journal article supplement (PMC7056554)
Supplement: NIHMS1544271-supplement-3.pdf [file NIHMS1544271-supplement-3.pdf]

**Supplementary Table 3:** Hazard ratios and 95% confidence intervals of the association between statin use and risk of prostate cancer subgroups classified by ERG and PTEN status in the Health Professionals Follow-up Study, 1990-2009

|                               | Overall, among cases assayed for ERG  |                          |                          | ERG-positive |                          |                          | ERG-negative |                          |                          | <i>p</i> <sub>het</sub> <sup>c</sup> |
|-------------------------------|---------------------------------------|--------------------------|--------------------------|--------------|--------------------------|--------------------------|--------------|--------------------------|--------------------------|--------------------------------------|
|                               | n                                     | HR <sup>a</sup> (95% CI) | HR <sup>b</sup> (95% CI) | n            | HR <sup>a</sup> (95% CI) | HR <sup>b</sup> (95% CI) | n            | HR <sup>a</sup> (95% CI) | HR <sup>b</sup> (95% CI) |                                      |
| <b>All cases</b>              | <b>888</b>                            |                          |                          | <b>417</b>   |                          |                          | <b>471</b>   |                          |                          |                                      |
| <b>Statin use</b>             |                                       |                          |                          |              |                          |                          |              |                          |                          |                                      |
| Never/past                    | 743                                   | 1.00 (ref)               | 1.00 (ref)               | 354          | 1.00 (ref)               | 1.00 (ref)               | 389          | 1.00 (ref)               | 1.00 (ref)               | 0.92                                 |
| Current                       | 145                                   | 1.09 (0.91-1.32)         | 1.00 (0.82-1.23)         | 63           | 1.08 (0.82-1.42)         | 0.99 (0.74-1.33)         | 82           | 1.10 (0.86-1.42)         | 1.01 (0.78-1.31)         |                                      |
| <b>Statin use</b>             |                                       |                          |                          |              |                          |                          |              |                          |                          |                                      |
| Never                         | 727                                   | 1.00 (ref)               | 1.00 (ref)               | 347          | 1.00 (ref)               | 1.00 (ref)               | 380          | 1.00 (ref)               | 1.00 (ref)               | 0.93                                 |
| Ever                          | 161                                   | 1.01 (0.84-1.21)         | 0.92 (0.75-1.12)         | 70           | 1.00 (0.77-1.30)         | 0.91 (0.68-1.20)         | 91           | 1.02 (0.80-1.30)         | 0.92 (0.72-1.19)         |                                      |
| <b>Duration of statin use</b> |                                       |                          |                          |              |                          |                          |              |                          |                          |                                      |
| Never                         | 727                                   | 1.00 (ref)               | 1.00 (ref)               | 347          | 1.00 (ref)               | 1.00 (ref)               | 380          | 1.00 (ref)               | 1.00 (ref)               | 0.99                                 |
| <5 years                      | 101                                   | 1.01 (0.81-1.25)         | 0.93 (0.74-1.17)         | 45           | 1.00 (0.73-1.37)         | 0.93 (0.67-1.28)         | 56           | 1.01 (0.75-1.36)         | 0.93 (0.69-1.27)         |                                      |
| ≥5 years                      | 60                                    | 1.01 (0.77-1.33)         | 0.89 (0.67-1.18)         | 25           | 0.99 (0.65-1.51)         | 0.87 (0.57-1.33)         | 35           | 1.03 (0.72-1.47)         | 0.90 (0.63-1.30)         |                                      |
| <b>Per year of statin use</b> | 888                                   | 1.00 (0.97-1.03)         | 0.98 (0.95-1.01)         | 417          | 1.00 (0.95-1.04)         | 0.98 (0.94-1.03)         | 471          | 1.00 (0.96-1.04)         | 0.98 (0.94-1.02)         | 0.97                                 |
|                               | Overall, among cases assayed for PTEN |                          |                          | PTEN-intact  |                          |                          | PTEN-null    |                          |                          |                                      |
|                               | n                                     | HR <sup>a</sup> (95% CI) | HR <sup>b</sup> (95% CI) | n            | HR <sup>a</sup> (95% CI) | HR <sup>b</sup> (95% CI) | n            | HR <sup>a</sup> (95% CI) | HR <sup>b</sup> (95% CI) |                                      |
| <b>All cases</b>              | <b>715</b>                            |                          |                          | <b>615</b>   |                          |                          | <b>100</b>   |                          |                          |                                      |
| <b>Statin use</b>             |                                       |                          |                          |              |                          |                          |              |                          |                          |                                      |
| Never/past                    | 582                                   | 1.00 (ref)               | 1.00 (ref)               | 489          | 1.00 (ref)               | 1.00 (ref)               | 93           | 1.00 (ref)               | 1.00 (ref)               | 0.01                                 |
| Current                       | 133                                   | 1.15 (0.95-1.40)         | 1.07 (0.86-1.33)         | 126          | 1.27 (1.04-1.56)         | 1.18 (0.95-1.48)         | 7            | 0.44 (0.21-0.92)         | 0.40 (0.19-0.87)         |                                      |
| <b>Statin use</b>             |                                       |                          |                          |              |                          |                          |              |                          |                          |                                      |
| Never                         | 568                                   | 1.00 (ref)               | 1.00 (ref)               | 477          | 1.00 (ref)               | 1.00 (ref)               | 91           | 1.00 (ref)               | 1.00 (ref)               | 0.01                                 |
| Ever                          | 147                                   | 1.06 (0.87-1.28)         | 0.97 (0.78-1.20)         | 138          | 1.15 (0.94-1.41)         | 1.06 (0.85-1.32)         | 9            | 0.47 (0.24-0.93)         | 0.43 (0.21-0.87)         |                                      |
| <b>Per year of statin use</b> | 715                                   | 1.00 (0.97-1.03)         | 0.99 (0.95-1.02)         | 615          | 1.01 (0.98-1.04)         | 1.00 (0.96-1.03)         | 100          | 0.90 (0.78-1.04)         | 0.88 (0.76-1.03)         | 0.06                                 |

<sup>a</sup>adjusted for age and calendar time

<sup>b</sup>adjusted for age, calendar time, race, family history of prostate cancer in father or brother, height, body mass index at age 21 years, body mass index, smoking, history of high cholesterol, history of hypertension, history of diabetes, PSA testing in the two years prior to the questionnaire date, PSA testing in >50% of possible time periods, aspirin use, physical activity, total calories.

<sup>c</sup>p-heterogeneity comparing estimates from multivariable models
