# Supplementary material
Source: PubMed Central journal article supplement (PMC7056554)
Supplement: NIHMS1544271-supplement-4.pdf [file NIHMS1544271-supplement-4.pdf]

**Supplementary Table 4:** Age-adjusted gene set enrichment analysis showing the top ten gene sets upregulated and downregulated in tumor-adjacent normal prostate tissue of ever (n=10) versus never (n=103) statin users, ordered by the normalized enrichment score.

| <b>KEGG pathway</b>                          | <b>Size</b> | <b>ES</b> | <b>NES</b> | <b>P-value</b> | <b>FDR</b> |
|----------------------------------------------|-------------|-----------|------------|----------------|------------|
| <b><i>Upregulated</i></b>                    |             |           |            |                |            |
| T_cell_receptor_signaling_pathway            | 108         | 0.50      | 1.95       | <0.001         | 0.091      |
| Intestinal_immune_network_for_IgA_production | 46          | 0.60      | 1.86       | 0.019          | 0.138      |
| Leishmania_infection                         | 70          | 0.56      | 1.84       | 0.008          | 0.116      |
| Primary_immunodeficiency                     | 35          | 0.59      | 1.79       | 0.010          | 0.156      |
| Asthma                                       | 29          | 0.62      | 1.75       | 0.025          | 0.185      |
| Prion_diseases                               | 35          | 0.53      | 1.73       | 0.014          | 0.172      |
| Regulation_of_actin_cytoskeleton             | 209         | 0.43      | 1.72       | 0.018          | 0.171      |
| Systemic_lupus_erythematosus                 | 128         | 0.44      | 1.70       | 0.016          | 0.175      |
| Viral_myocarditis                            | 69          | 0.51      | 1.65       | 0.036          | 0.240      |
| RNA_degradation                              | 57          | 0.55      | 1.61       | 0.039          | 0.292      |
| <b><i>Downregulated</i></b>                  |             |           |            |                |            |
| Beta_alanine_metabolism                      | 22          | -0.56     | -1.66      | 0.015          | 0.812      |
| Valine_leucine_and_isoleucine_degradation    | 44          | -0.57     | -1.62      | 0.032          | 0.578      |
| PPAR_signaling_pathway                       | 68          | -0.39     | -1.53      | 0.025          | 0.758      |
| Alpha_lineolic_acid_metabolism               | 18          | -0.50     | -1.50      | 0.039          | 0.695      |
| Terpenoid_backbone_synthesis                 | 15          | -0.57     | -1.44      | 0.087          | 0.761      |
| O_glycan_synthesis                           | 30          | -0.43     | -1.44      | 0.056          | 0.640      |
| Steroid_biosynthesis                         | 16          | -0.58     | -1.41      | 0.134          | 0.657      |
| Primary_bile_acid_biosynthesis               | 16          | -0.47     | -1.40      | 0.087          | 0.604      |
| Pantothenate_and_CoA_biosynthesis            | 16          | -0.45     | -1.39      | 0.074          | 0.557      |
| Fatty_acid_metabolism                        | 39          | -0.43     | -1.39      | 0.085          | 0.509      |

Abbreviations: ES=enrichment score; NES=normalized enrichment score; FDR=false discovery rate
